# Supplementary material for: Improving outcomes for neonates with gastroschisis in low-income and middle-income countries: a systematic review protocol
Source: PubMed Central journal article supplement (PMC6326322; doi:10.1136/bmjpo-2018-000392), 2018-12-27
Supplement: bmjpo-2018-000392supp002.pdf [file bmjpo-2018-000392supp002.pdf]

## Supplementary File 2

### Improving outcomes for neonates with gastroschisis in low- and middle-income countries: a systematic review protocol

Database(s): Ovid MEDLINE(R) In-Process & Other Non-Indexed Citations and Ovid MEDLINE(R) 1946 to Present

| #  | Searches                                                                                                                                                                                                                                                                                                                                                                                                                                                                                                                                                                                                          | Results |
|----|-------------------------------------------------------------------------------------------------------------------------------------------------------------------------------------------------------------------------------------------------------------------------------------------------------------------------------------------------------------------------------------------------------------------------------------------------------------------------------------------------------------------------------------------------------------------------------------------------------------------|---------|
| 1  | exp Infant, Newborn/                                                                                                                                                                                                                                                                                                                                                                                                                                                                                                                                                                                              | 564962  |
| 2  | (neonate* or newborn*).mp.                                                                                                                                                                                                                                                                                                                                                                                                                                                                                                                                                                                        | 723943  |
| 3  | 1 or 2                                                                                                                                                                                                                                                                                                                                                                                                                                                                                                                                                                                                            | 726361  |
| 4  | anorectal malformations/                                                                                                                                                                                                                                                                                                                                                                                                                                                                                                                                                                                          | 499     |
| 5  | anus, imperforate/                                                                                                                                                                                                                                                                                                                                                                                                                                                                                                                                                                                                | 2460    |
| 6  | esophageal atresia/                                                                                                                                                                                                                                                                                                                                                                                                                                                                                                                                                                                               | 3337    |
| 7  | intestinal atresia/                                                                                                                                                                                                                                                                                                                                                                                                                                                                                                                                                                                               | 1996    |
| 8  | hernias, diaphragmatic, congenital/                                                                                                                                                                                                                                                                                                                                                                                                                                                                                                                                                                               | 4294    |
| 9  | gastroschisis/                                                                                                                                                                                                                                                                                                                                                                                                                                                                                                                                                                                                    | 1128    |
| 10 | duodenal obstruction/                                                                                                                                                                                                                                                                                                                                                                                                                                                                                                                                                                                             | 3179    |
| 11 | intestinal volvulus/                                                                                                                                                                                                                                                                                                                                                                                                                                                                                                                                                                                              | 2298    |
| 12 | Gastroschisis/                                                                                                                                                                                                                                                                                                                                                                                                                                                                                                                                                                                                    | 1128    |
| 13 | Anorectal Malformations/                                                                                                                                                                                                                                                                                                                                                                                                                                                                                                                                                                                          | 499     |
| 14 | Anus, Imperforate/                                                                                                                                                                                                                                                                                                                                                                                                                                                                                                                                                                                                | 2460    |
| 15 | Duodenal Obstruction/                                                                                                                                                                                                                                                                                                                                                                                                                                                                                                                                                                                             | 3179    |
| 16 | Intestinal Atresia/                                                                                                                                                                                                                                                                                                                                                                                                                                                                                                                                                                                               | 1996    |
| 17 | Intestinal Volvulus/                                                                                                                                                                                                                                                                                                                                                                                                                                                                                                                                                                                              | 2298    |
| 18 | Hernias, Diaphragmatic, Congenital/                                                                                                                                                                                                                                                                                                                                                                                                                                                                                                                                                                               | 4294    |
| 19 | Esophageal Atresia/                                                                                                                                                                                                                                                                                                                                                                                                                                                                                                                                                                                               | 3337    |
| 20 | Tracheoesophageal Fistula/                                                                                                                                                                                                                                                                                                                                                                                                                                                                                                                                                                                        | 3467    |
| 21 | ("congenital anomal*" or "congenital abnormal*" or "birth defect*" or gastroschisis or exomphalos or omphaloc?ele or "abdominal wall defect" or "anorectal malformation" or "imperforate anus" or "duodenal atresia" or "colon* atresia" or "intestin* atresia" or malrotation or "congenital diaphragmatic hernia*" or "?esophageal atresia" or "tracheo-?esophageal fistula" or volvulus or "congenital malformation*" or "jejunal atresia" or "jejuno-ileal atresia" or "ileal atresia" or "Hirschsprung's disease" or aganglionosis or "apple peel syndrome*" or "anorectal stenosis" or "anal atresia*").mp. | 98434   |
| 22 | or/4-21                                                                                                                                                                                                                                                                                                                                                                                                                                                                                                                                                                                                           | 104428  |
| 23 | Developing Countries/                                                                                                                                                                                                                                                                                                                                                                                                                                                                                                                                                                                             | 69831   |

|    |                                          |        |
|----|------------------------------------------|--------|
| 24 | exp Africa/                              | 233166 |
| 25 | exp Asia, Central/                       | 6779   |
| 26 | exp Transcaucasia/                       | 3966   |
| 27 | exp Central America/                     | 14334  |
| 28 | Afghanistan/                             | 2857   |
| 29 | Albania/                                 | 762    |
| 30 | American Samoa/                          | 159    |
| 31 | Argentina/                               | 13689  |
| 32 | Bangladesh/                              | 9034   |
| 33 | Bhutan/                                  | 343    |
| 34 | Bolivia/                                 | 2275   |
| 35 | "Bosnia and Herzegovina"/                | 1847   |
| 36 | Brazil/                                  | 76758  |
| 37 | Bulgaria/                                | 6069   |
| 38 | Cambodia/                                | 2835   |
| 39 | China/                                   | 132950 |
| 40 | Comoros/                                 | 260    |
| 41 | Croatia/                                 | 6164   |
| 42 | Cuba/                                    | 4750   |
| 43 | "Democratic People's Republic of Korea"/ | 184    |
| 44 | Dominica/                                | 84     |
| 45 | Ecuador/                                 | 3085   |
| 46 | Fiji/                                    | 834    |
| 47 | Grenada/                                 | 117    |
| 48 | Guyana/                                  | 621    |
| 49 | Haiti/                                   | 2834   |
| 50 | India/                                   | 91150  |
| 51 | Indonesia/                               | 8786   |
| 52 | Iran/                                    | 20716  |
| 53 | Iraq/                                    | 4218   |
| 54 | Jamaica/                                 | 3295   |
| 55 | Jordan/                                  | 3484   |

|    |                                     |       |
|----|-------------------------------------|-------|
| 56 | Kosovo/                             | 124   |
| 57 | Lebanon/                            | 3590  |
| 58 | Laos/                               | 1634  |
| 59 | Madagascar/                         | 3026  |
| 60 | Malaysia/                           | 12977 |
| 61 | Mauritius/                          | 510   |
| 62 | Mexico/                             | 33915 |
| 63 | Micronesia/                         | 1074  |
| 64 | Moldova/                            | 642   |
| 65 | Mongolia/                           | 1532  |
| 66 | Montenegro/                         | 159   |
| 67 | Myanmar/                            | 1892  |
| 68 | Nepal/                              | 6570  |
| 69 | Pakistan/                           | 14361 |
| 70 | Papua New Guinea/                   | 3214  |
| 71 | Paraguay/                           | 691   |
| 72 | Peru/                               | 7366  |
| 73 | Philippines/                        | 7578  |
| 74 | "Republic of Belarus"/              | 1992  |
| 75 | Romania/                            | 9348  |
| 76 | Russia/                             | 36547 |
| 77 | Saint Lucia/                        | 64    |
| 78 | "Saint Vincent and the Grenadines"/ | 46    |
| 79 | Samoa/                              | 295   |
| 80 | Serbia/                             | 2531  |
| 81 | Sri Lanka/                          | 5179  |
| 82 | Suriname/                           | 855   |
| 83 | Syria/                              | 1400  |
| 84 | Thailand/                           | 23569 |
| 85 | Timor-Leste/                        | 148   |
| 86 | Turkey/                             | 29917 |
| 87 | Ukraine/                            | 15218 |

|     |                                                                                                                                                                                                                                                                                                                                                                                                                                                                                                                                                                                                                                                                                                                                                                                                                                                                                                                                                                                                                                                                                                                                                    |         |
|-----|----------------------------------------------------------------------------------------------------------------------------------------------------------------------------------------------------------------------------------------------------------------------------------------------------------------------------------------------------------------------------------------------------------------------------------------------------------------------------------------------------------------------------------------------------------------------------------------------------------------------------------------------------------------------------------------------------------------------------------------------------------------------------------------------------------------------------------------------------------------------------------------------------------------------------------------------------------------------------------------------------------------------------------------------------------------------------------------------------------------------------------------------------|---------|
| 88  | Vanuatu/                                                                                                                                                                                                                                                                                                                                                                                                                                                                                                                                                                                                                                                                                                                                                                                                                                                                                                                                                                                                                                                                                                                                           | 321     |
| 89  | Venezuela/                                                                                                                                                                                                                                                                                                                                                                                                                                                                                                                                                                                                                                                                                                                                                                                                                                                                                                                                                                                                                                                                                                                                         | 4626    |
| 90  | Vietnam/                                                                                                                                                                                                                                                                                                                                                                                                                                                                                                                                                                                                                                                                                                                                                                                                                                                                                                                                                                                                                                                                                                                                           | 10611   |
| 91  | Yemen/                                                                                                                                                                                                                                                                                                                                                                                                                                                                                                                                                                                                                                                                                                                                                                                                                                                                                                                                                                                                                                                                                                                                             | 1234    |
| 92  | (afghanistan or albania or algeria or "american samoa" or angola or argentina or armenia or azerbaijan or bangladesh or belarus or belize or benin or bhutan or bolivia or bosnia or botswana or brazil or bulgaria or "burkina faso" or burundi or "cabo verde" or "cape verde" or cambodia or cameroon or "central africa" republic or chad or china or columbia or comoros or "costa rica" or "cote d'ivoire" or croatia or cuba or "democratic people's republic of korea" or "democratic republic of the congo" or djibouti or dominica or "dominica republic" or drc or "east timor" or eritrea or ecuador or "el salvador" or egypt or ethiopia or fiji or gabon or gambia or gaza or republic georgia or ghana or grenada or guatemala or guinea or "guinea-bissau" or guyana or haiti or herzegovina or honduras or india or indonesia or iran or "ivory coast" or jamaica or jordan or kazakhstan or kenya or kiribati or kosovo or "kyrgyz republic" or "lao pdr" or laos).mp.                                                                                                                                                          | 825783  |
| 93  | (lebanon or lesotho or liberia or libya or macedonia or madagascar or malawi or malaysia or maldives or mali or "marshall islands" or mauritania or mauritius or mexico or micronesia or moldova or mongolia or montenegro or morocco or mozambique or myanmar or namibia or nauru or nepal or nicaragua or nigeria or "timor-leste" or iraq or niger or panama or pakistan or "papua new guinea" or paraguay or peru or philippines or romania or russia or "russian federation" or russia or rwanda or ruanda or "saint lucia" or "saint vincent and the grenadines" or samoa or "sao tome and principe" or senegal or senegambia or serbia or "sierra leone" or "solomon islands" or somalia or somaliland or "south africa" or "sri lanka" or "st lucia" or "st vincent and the grenadines" or "sub-saharan africa" or sudan or suriname or syria or "syrian arab republic" or swaziland or tajikistan or tanzania or thailand or togo or tonga or tunisia or turkey or turkmenistan or tuvalu or uganda or ukraine or uzbekistan or vanuatu or venezuela or vietnam or "west bank" or yemen or yugoslavia or zaire or zambia or zimbabwe).mp. | 531582  |
| 94  | (kabul or Porto-Novo or Hogbonou or Adjace or Cotonou or Kutonu or Ouagadougou or Ouaga or Bujumbura or Usumbura or Phnom Penh or Bangui or Bangi or N'Djamena or Ndjamena or Fort Lamy or Moroni or Kinshasa or Asmara or Asmera or Addis Ababa or Addis Abeba or Banjul or Bathurst or Conakry or Bissau or Port-au-Prince or Pyongyang or Monrovia or Antananarivo or Tananarive or Tana or Lilongwe or Bamako or Maputo or Lourenco Marques or Kathmandu or Niamey or Kigali or Freetown or Free-town or Mogadishu or Xamar or Hamar or Muqdisho or Maqadishu or Juba or Dodoma or Dar es Salaam or Lome or Kampala or Harare or Salisbury or Yerevan or Dhaka or Dacca or Thimphu or Thimbu or Sucre or Charcas or La Plata or Chuquisaca or La Paz or Praia or Yaounde or Jaunde or Brazzaville or Yamoussoukro or Cairo or Accra).mp.                                                                                                                                                                                                                                                                                                       | 24386   |
| 95  | (Tegucigalpa or Tegus or New Delhi or Jakarta or Nairobi or South Tarawa or Tarawa Teinainano or Pristina or Prishtina or Bishkek or Pishpek or Frunze or Vientiane or Maseru or Nouakchott or Palikir or Chisinau or Kishinev or Rabat or Nay Pyi Taw or Naypyidaw or Nepranytau or Naypyitaw or Kyetpyay or Pynmana or Kyatpyay or Pynmana or Yangon or Rangoon or Managua or Abuja or Lagos or Islamabad or Port Moresby or Moresby or Pom Town or Manila or Apia or Dakar or Honiara or Jayawardenepura or Jayawardenepura or Khartoum or Mbabane or Embabane or Lobamba or Damascus or Dushanbe or Dyushambe or Stalinabad or Dili or Kyiv or Kiev or Tashkent or Toshkent or Port Vila or Hanoi or Ha Noi or Sana'a or Sanaa or Sana or Lusaka or Ulaanbaatar or Ulan-Bator or Luanda or Tbilisi or Amman).mp.                                                                                                                                                                                                                                                                                                                               | 21747   |
| 96  | (("under developed" or underdeveloped or low income or middle income or developing or less developed or "third world" or poor or LMI or LLMI or LAMI) adj1 (countr* or nation* or economy or economies)).mp.                                                                                                                                                                                                                                                                                                                                                                                                                                                                                                                                                                                                                                                                                                                                                                                                                                                                                                                                       | 128848  |
| 97  | (("resource limited" or "low resource") adj1 (countr* or setting*)).mp.                                                                                                                                                                                                                                                                                                                                                                                                                                                                                                                                                                                                                                                                                                                                                                                                                                                                                                                                                                                                                                                                            | 7852    |
| 98  | ("less resourced communit*" or LMIC or LMICs).mp.                                                                                                                                                                                                                                                                                                                                                                                                                                                                                                                                                                                                                                                                                                                                                                                                                                                                                                                                                                                                                                                                                                  | 2416    |
| 99  | or/23-98                                                                                                                                                                                                                                                                                                                                                                                                                                                                                                                                                                                                                                                                                                                                                                                                                                                                                                                                                                                                                                                                                                                                           | 1391627 |
| 100 | 3 and 22 and 99                                                                                                                                                                                                                                                                                                                                                                                                                                                                                                                                                                                                                                                                                                                                                                                                                                                                                                                                                                                                                                                                                                                                    | 2565    |
| 101 | exp animals/ not humans/                                                                                                                                                                                                                                                                                                                                                                                                                                                                                                                                                                                                                                                                                                                                                                                                                                                                                                                                                                                                                                                                                                                           | 4448581 |
| 102 | 100 not 101                                                                                                                                                                                                                                                                                                                                                                                                                                                                                                                                                                                                                                                                                                                                                                                                                                                                                                                                                                                                                                                                                                                                        | 2551    |
